# Supplementary material for: Recyclable and elastic highly thermally conductive epoxy-based composites with covalent–noncovalent interpenetrating networks
Source: Royal Society of Chemistry journal article supplement (doi:10.1039/d4mh00382a), 2024-01-01
Supplement: d4mh00382a1.pdf [file d4mh00382a1.pdf]

# Recyclable and Elastic Highly Thermally Conductive Epoxy-based Composite with Covalent-Noncovalent Interpenetrating Network

Fubin Luo <sup>1\*</sup>, Wenqi Cui<sup>1,2</sup>, Yingbing Zou<sup>1,2</sup>, Hongzhou Li<sup>1,2</sup>, Qingrong Qian<sup>2</sup>,

Qinghua Chen<sup>1</sup>

<sup>1</sup> Engineering Research Center of polymer Green Recycling of Ministry of Education, Fujian Normal University, Fuzhou 350007, People's Republic of China

<sup>2</sup> Fujian Key Laboratory of Pollution Control & Resource Reuse, College of Environmental and Resource Sciences, Fujian Normal University, Fuzhou 350007, Fujian Province, People's Republic of China

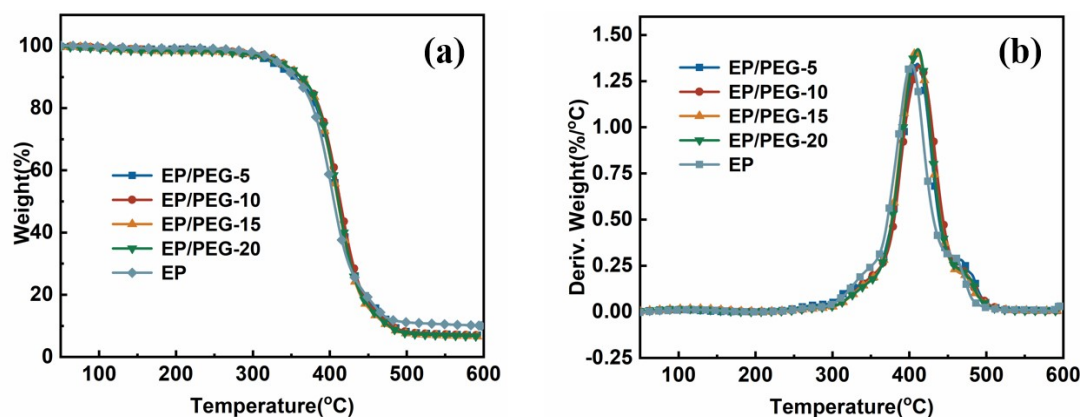

Figure S1 TGA and DTG curves

---

\* Corresponding author, E-mail address: luofubin@fjnu.edu.cn;

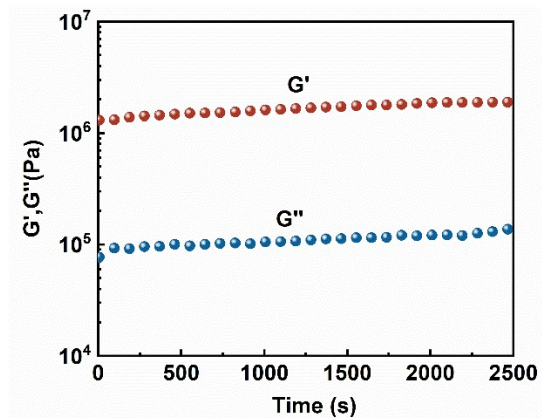

**Figure S2** time-resolved rheological test results at 180 °C

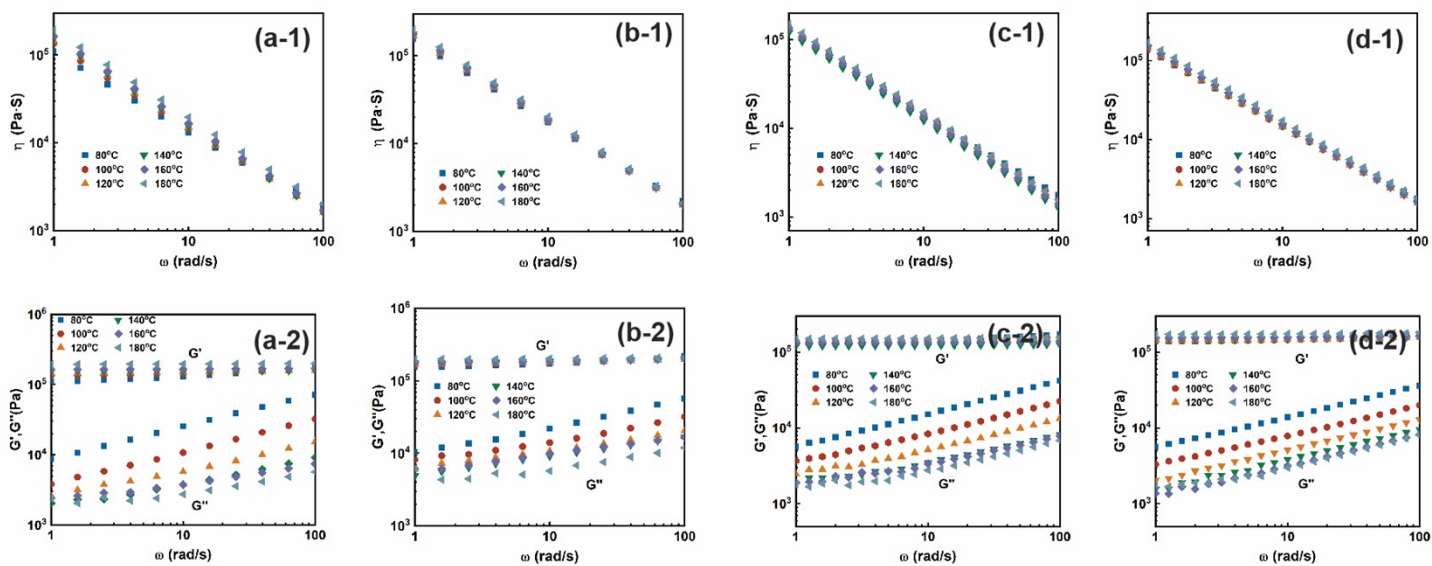

**Figure S3** small-amplitude oscillatory shear of (a-1, a-2) EP/PEG-5; (b-1, b-2) EP/PEG-10; (c-1, c-2) EP/PEG-15; (d-1, d-2) EP/PEG-20

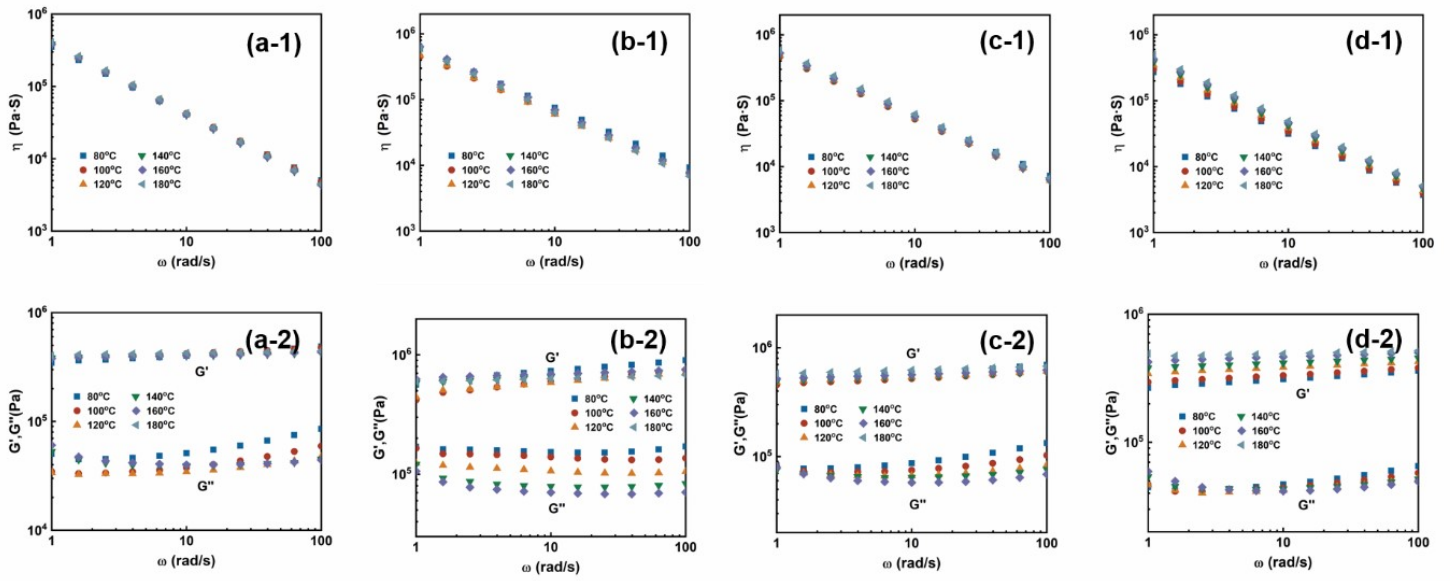

**Figure S4** small-amplitude oscillatory shear of (a-1, a-2) EP/PEG20BN30LM5  
; (b-1, b-2) EP/PEG20BN30LM10; (c-1, c-2) EP/PEG20BN30LM15; (d-1, d-2)  
EP/PEG20BN30LM20
